# Supplementary material
Source: PubMed Central journal article supplement (PMC6240866)
Supplement: supp_RA118.005649_140503_1_supp_205896_pfb4cc.pdf [file supp_RA118.005649_140503_1_supp_205896_pfb4cc.pdf]

## Supporting Information

Molecular determinants of  $\alpha$ -conotoxin potency for inhibition of human and rat  $\alpha 6\beta 4$  nicotinic acetylcholine receptors

**Arik J. Hone<sup>1</sup>, Todd T. Talley<sup>2</sup>, Janet Bobango<sup>3</sup>, Cesar Huidobro Melo<sup>1</sup>, Fuaad Hararah<sup>1</sup>, Joanna Gajewiak<sup>1</sup>, Sean Christensen<sup>1</sup>, Peta J. Harvey<sup>4</sup>, David J. Craik<sup>4</sup>, J. Michael McIntosh<sup>1,5,6</sup>**

Running title: Determinants of  $\alpha$ -Ctx potency for human  $\alpha 6\beta 4$  nAChRs

<sup>1</sup>Departments of Biology and <sup>5</sup>Psychiatry, University of Utah, Salt Lake City, Utah, USA; <sup>6</sup>George E. Whalen Veterans Affairs Medical Center, Salt Lake City, Utah, USA; <sup>2</sup>T3 Biosciences, Moses Lake, Washington, USA; <sup>3</sup>Department of Biomedical and Pharmaceutical Sciences, The University of Montana, Missoula, Montana, USA; <sup>4</sup>University of Queensland, Institute for Molecular Bioscience, Brisbane, Queensland, Australia.

**Table S1**

Crystallography statistics

|                                    |                               |
|------------------------------------|-------------------------------|
| Data collection                    |                               |
| Resolution range (Å)               | 48.82 - 2.34 (2.42 - 2.34)    |
| Space group                        | C 2 2 2 <sub>1</sub>          |
| Unit cell                          | 145.12 147.89 146.31 90 90 90 |
| Completeness (%)                   | 98.9                          |
| Unique reflections                 | 66,040 (6,263)                |
| Wilson B-factor (Å <sup>2</sup> )  | 34.8                          |
| Refinement                         |                               |
| Number of residues                 |                               |
| AChBP                              | 1032                          |
| PeIA                               | 68                            |
| Water                              | 332                           |
| <i>R</i> (work) (%)                | 0.1959                        |
| <i>R</i> (free) (%)                | 0.228                         |
| RMS bonds (Å)                      | 0.008                         |
| RMS angles                         | 1.29                          |
| Ramachandran favored (%)           | 97.1                          |
| Ramachandran allowed (%)           | 2.9                           |
| Ramachandran outliers (%)          | 0.0                           |
| Average <i>B</i> (Å <sup>2</sup> ) | 39.89                         |
| AChBP                              | 39.92                         |
| PeIA                               | 63.31                         |
| Water                              | 38.66                         |

**Table S2**

Statistical analysis of [P13A]PeIA structures

---

|                                                 |                 |
|-------------------------------------------------|-----------------|
| Experimental restraints                         |                 |
| total no. distance restraints                   | 90              |
| intraresidue                                    | 36              |
| sequential                                      | 36              |
| medium range, $i-j < 5$                         | 14              |
| long range, $i-j \geq 5$                        | 4               |
| hydrogen bond restraints                        | 4               |
| dihedral angle restraints                       |                 |
| phi                                             | 8               |
| psi                                             | 6               |
| Violations                                      |                 |
| NOE violations exceeding 0.2 Å                  | 0               |
| Dihedral violations exceeding 2.0 Å             | 0               |
| Rms deviation from mean structure, Å            |                 |
| backbone atoms                                  | $0.60 \pm 0.16$ |
| all heavy atoms                                 | $1.13 \pm 0.22$ |
| Stereochemical quality <sup>b</sup>             |                 |
| Residues in most favored Ramachandran region, % | $93.2 \pm 5.8$  |
| Ramachandran outliers, %                        | $0.0 \pm 0.0$   |
| Unfavorable sidechain rotamers, %               | $17.7 \pm 3.5$  |
| Clash score, all atoms                          | $0.5 \pm 1.5$   |
| Overall MolProbity score                        | $1.8 \pm 0.2$   |

---

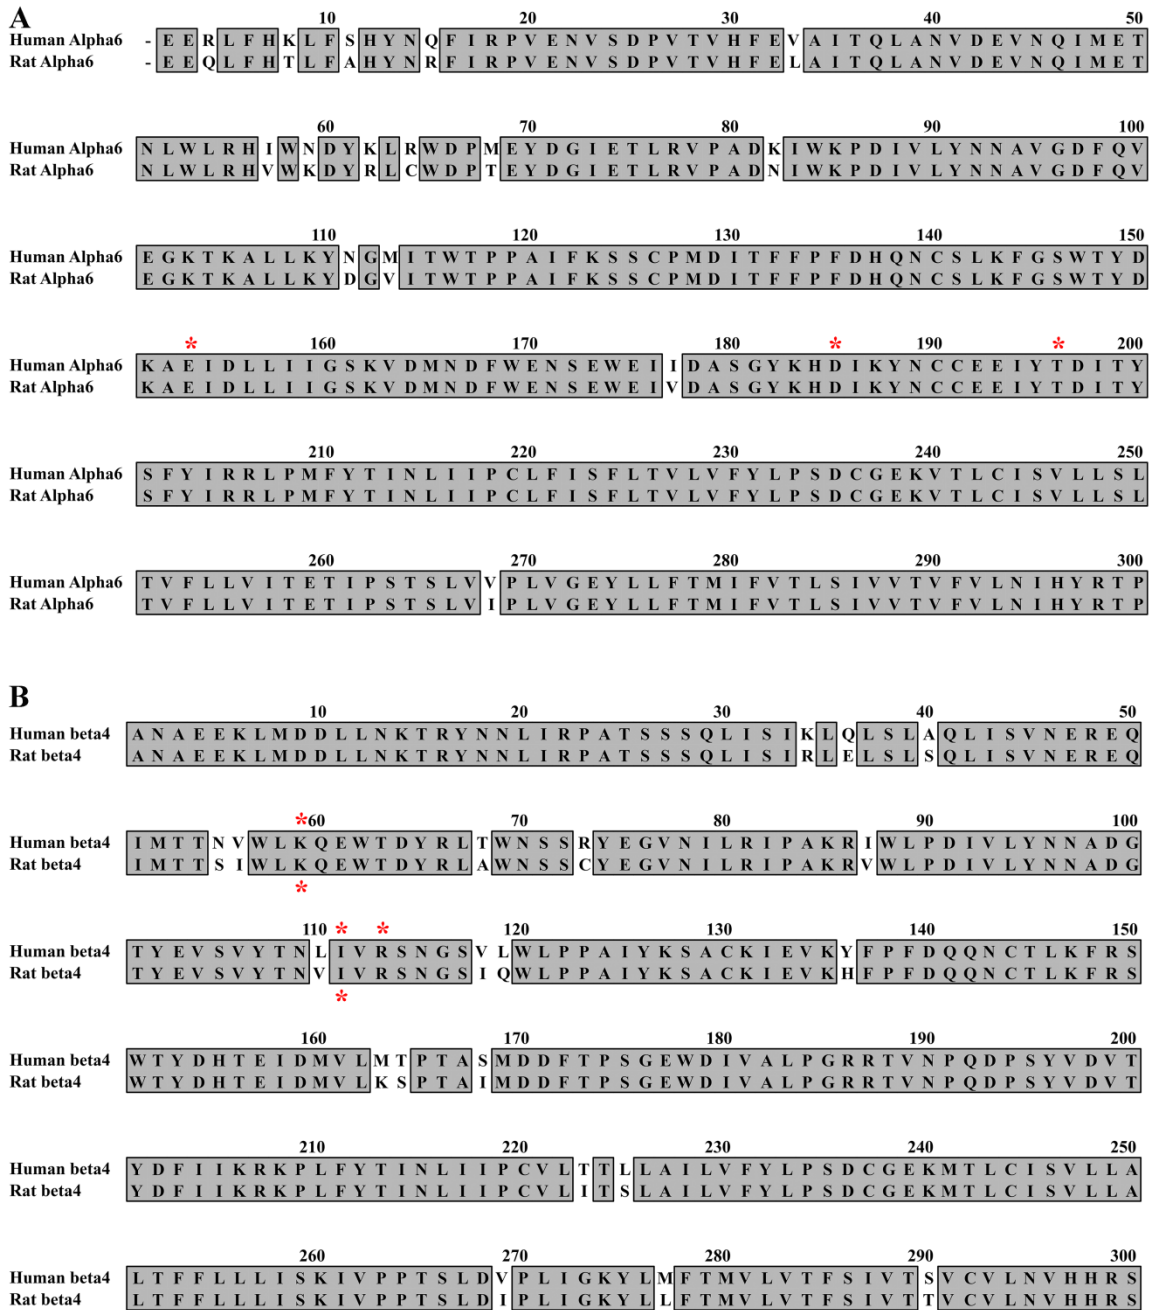

**FIGURE S1. Sequence homology of human and rat  $\alpha 6$  and  $\beta 4$  subunits.** (A) Sequence alignment of human and rat  $\alpha 6$  subunits. A pairwise analysis of the extracellular ligand-binding domains (residues 1-206) indicated 192 (93%) conserved identities. Red asterisks indicate residues that have previously been shown in functional assays to be important for  $\alpha$ -Ctx binding to rat  $\alpha 6/\alpha 3\beta 2\beta 3$  nAChRs (1). (B) Sequence alignment of human and rat  $\beta 4$  subunits. A pairwise analysis of the extracellular ligand-binding domains (residues 1-208) indicated 193 (93%) conserved identities. Red asterisks indicate residues that have previously been shown in functional assays to be important for  $\alpha$ -Ctx binding to  $\alpha 3\beta 4$  nAChRs (2). Asterisks above the sequence line indicate residues identified in human receptors and those below indicate rat receptors. Alignments and sequence comparisons were performed using MacVector.

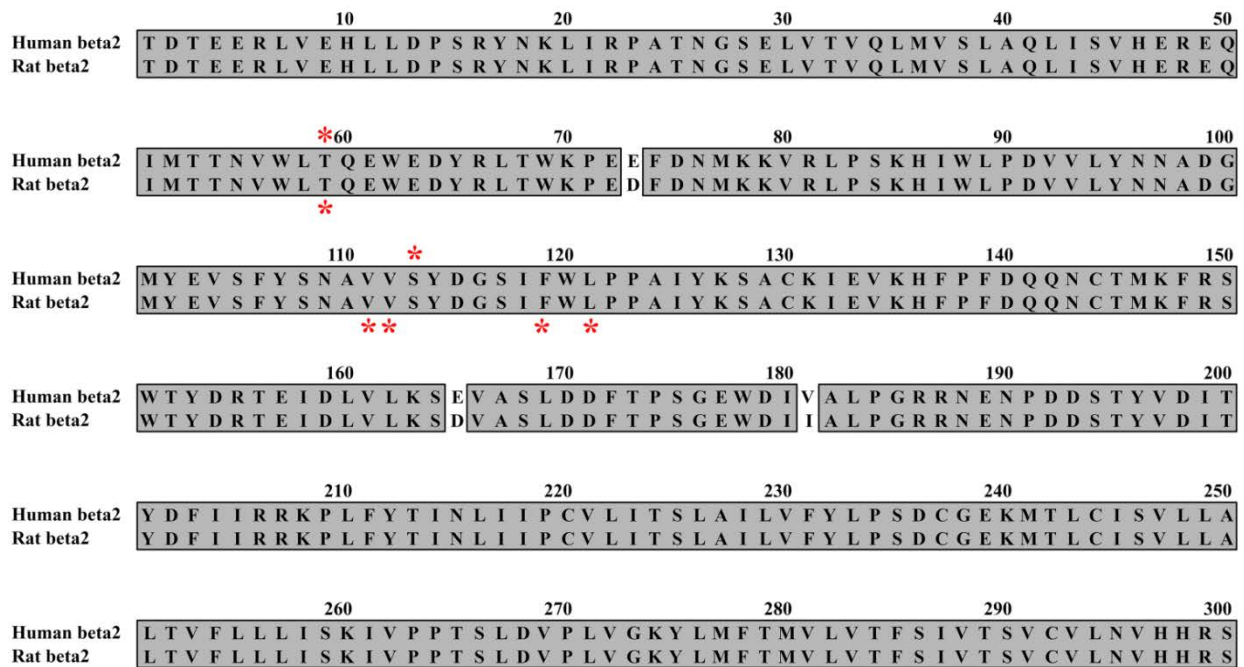

FIGURE S2. **Sequence homology of human and rat  $\beta 2$  subunits.** (A) Sequence alignment of human and rat  $\beta 2$  subunits. A pairwise analysis of the extracellular ligand-binding domains (residues 1-208) indicated 205 (99%) conserved identities. Red asterisks indicate residues that have previously been shown in functional assays to be important for  $\alpha$ -Ctx binding to human (2) and rat  $\alpha 3\beta 2$  nAChRs (3-5). Asterisks above the sequence line indicate residues identified in human receptors and those below indicate rat receptors. Alignments and sequence comparisons were performed using MacVector.

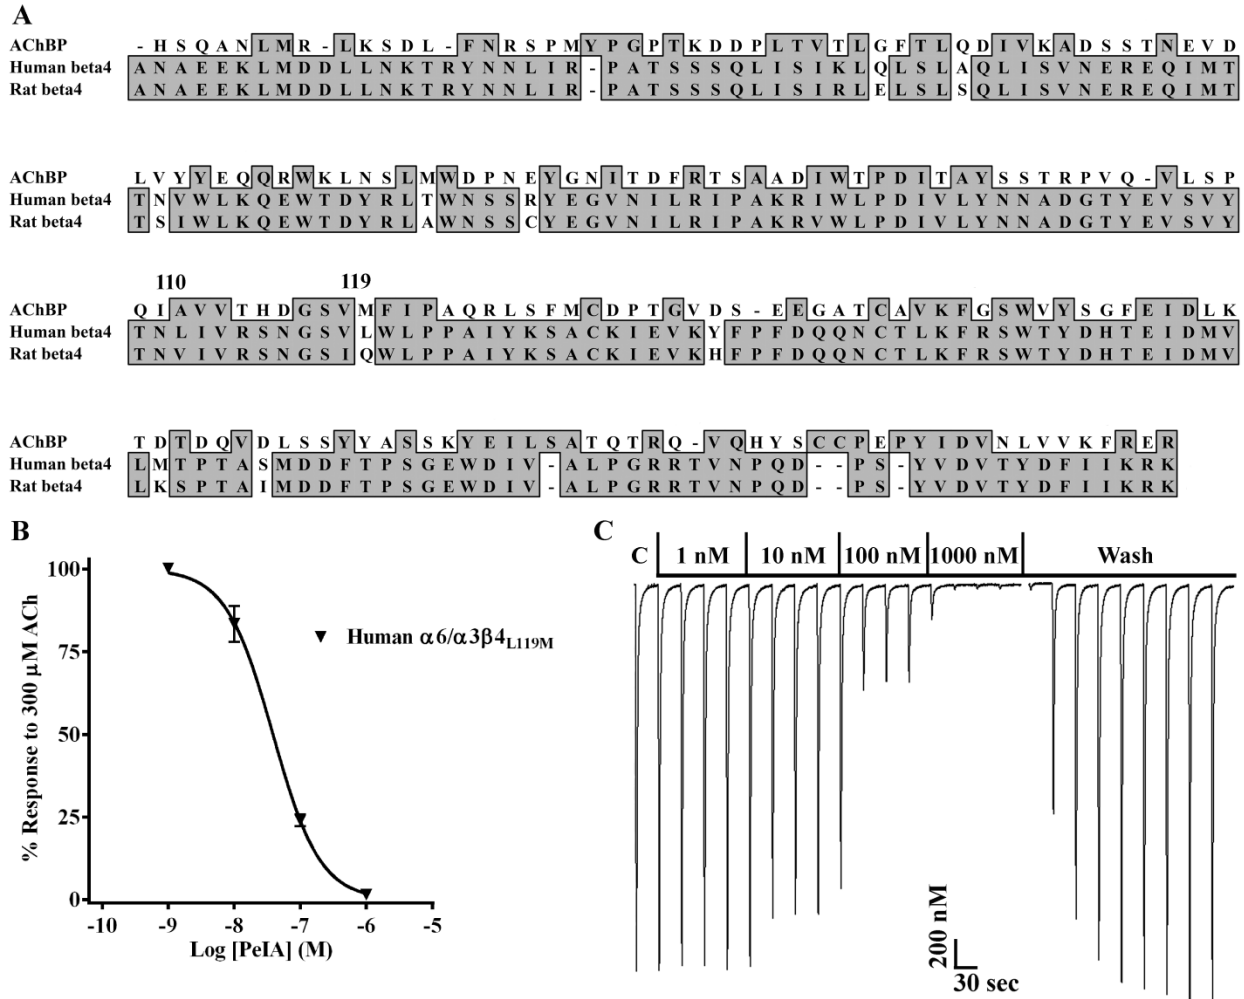

**FIGURE S3. Sequence comparison of the *Aplysia californica* AChBP with nAChR  $\beta 4$  subunits, and the effect of Met substitution of human  $\beta 4_{\text{Leu119}}$  on the potency of PeIA. (A) Sequence alignment of the AChBP with human and rat  $\beta 4$  subunits. Note that for key residues 110, 118, and 119 of the ligand-binding pocket, only position 119 varies significantly among the three sequences. (B) Concentration-response analysis of the potency of PeIA on mutant human  $\alpha 6/\alpha 3\beta 4_{\text{L119M}}$  nAChRs. PeIA inhibited  $\alpha 6/\alpha 3\beta 4_{\text{L119M}}$  nAChRs with an  $\text{IC}_{50}$  of 38.5 (34.4-43.1) nM. Values in parentheses indicate the 95% confidence interval and the error bars represent  $\pm$  SDM of the data obtained from 4 individual oocytes. (C) Current traces showing the inhibition of the ACh-evoked responses by the indicated concentrations of PeIA. The traces have been concatenated for brevity. C indicates a control response in the absence of PeIA. Alignments and sequence comparisons were performed using MacVector; numbering follows that of the AChBP sequence.**

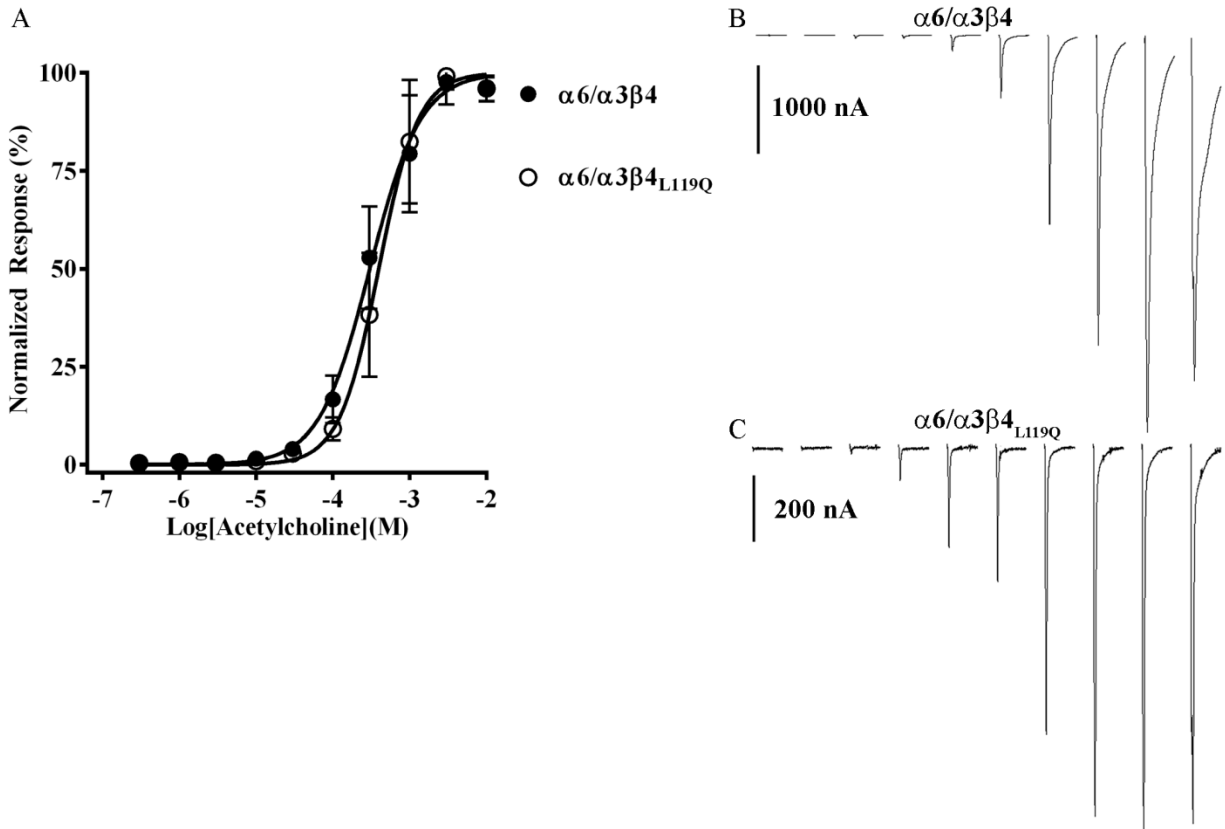

**FIGURE S4. Concentration-response relationship for activation of human  $\alpha 6/\alpha 3\beta 4$  and  $\alpha 6/\alpha 3\beta 4_{L119Q}$  nAChRs by acetylcholine.** *Xenopus laevis* oocytes expressing  $\alpha 6/\alpha 3\beta 4$  or  $\alpha 6/\alpha 3\beta 4_{L119Q}$  nAChRs were subjected to TEVC electrophysiology and the  $EC_{50}$  values determined for activation by acetylcholine as described in Experimental Procedures. (A) Concentration-response analysis of ACh-gated currents obtained by applying ascending concentrations of agonist. Acetylcholine activated  $\alpha 6/\alpha 3\beta 4$  nAChRs with an  $EC_{50}$  value of 303 (267-344)  $\mu M$  and a Hill slope of 1.3 (1.1-1.5) ( $n=6$ ) and  $\alpha 6/\alpha 3\beta 4_{L119Q}$  mutant nAChRs with an  $EC_{50}$  value of 396 (355-441)  $\mu M$  and a Hill slope of 1.7 (1.4-2.0) ( $n=7$ ). The values in parentheses denote the 95% confidence interval. Error bars denote  $\pm$  SDM. (B) Representative current traces for activation  $\alpha 6/\alpha 3\beta 4$  nAChRs by 300 nM through 10 mM ACh. (C) Representative current traces for activation of  $\alpha 6/\alpha 3\beta 4_{L119Q}$  nAChRs by 300 nM through 10 mM acetylcholine. ACh was applied every 65 sec from the lowest to highest concentration and each current trace is 30 sec in duration.

## Reference

1. McIntosh, J. M., Azam, L., Staheli, S., Dowell, C., Lindstrom, J. M., Kuryatov, A., Garrett, J. E., Marks, M. J., and Whiteaker, P. (2004) Analogs of alpha-conotoxin MII are selective for alpha6-containing nicotinic acetylcholine receptors. *Mol Pharmacol* **65**, 944-952
2. Cuny, H., Kompella, S. N., Tae, H. S., Yu, R., and Adams, D. J. (2016) Key Structural Determinants in the Agonist Binding Loops of Human beta2 and beta4 Nicotinic Acetylcholine Receptor Subunits Contribute to alpha3beta4 Subtype Selectivity of alpha-Conotoxins. *J Biol Chem* **291**, 23779-23792
3. Dutertre, S., Nicke, A., and Lewis, R. J. (2005) Beta2 subunit contribution to 4/7 alpha-conotoxin binding to the nicotinic acetylcholine receptor. *J Biol Chem* **280**, 30460-30468
4. Shiembob, D. L., Roberts, R. L., Luetje, C. W., and McIntosh, J. M. (2006) Determinants of alpha-conotoxin BuIA selectivity on the nicotinic acetylcholine receptor beta subunit. *Biochemistry* **45**, 11200-11207
5. Harvey, S. C., McIntosh, J. M., Cartier, G. E., Maddox, F. N., and Luetje, C. W. (1997) Determinants of specificity for alpha-conotoxin MII on alpha3beta2 neuronal nicotinic receptors. *Mol Pharmacol* **51**, 336-342
